# Supplementary material for: Optimal scheduling of the next preventive maintenance activity for awind farm
Source: Copernicus journal article supplement (doi:10.5194/wes-2020-129), 2020-12-09
Supplement: Supplementary file [file wes-2020-129-AC2-supplement.pdf]

## 0.1 Study 2: seasonal effects

Part A. To address the seasonal effects of the mobilization costs  $d_t$ , the following mobilization costs (in thousands of USD) for different months in a year are used:

| Jan | Feb | Mar | Apr | May | Jun | Jul | Aug | Sep | Oct | Nov | Dec |
|-----|-----|-----|-----|-----|-----|-----|-----|-----|-----|-----|-----|
| 15  | 13  | 11  | 9   | 7   | 5   | 5   | 7   | 9   | 11  | 13  | 15  |

- 5 The mobilization costs for different months are different, but for the same month at different years are the same. The average mobilization cost is  $\bar{d} = 10$ . These numbers are obtained based on a discussion with the experts within the Swedish Wind Power Technology Centre (SWPTC). Table 1 summarises the results produced by the NextPM algorithm applied to the following three settings:

the winter start scenario (i.e. the wind turbine start function at Jan) with

$$d_1 = 7.5, d_2 = 6.5, \dots, d_{12} = 7.5, d_{13} = 7.5, d_{14} = 6.5, \dots,$$

the summer start scenario (i.e. the wind turbine start function at Jul) with

$$d_1 = 2.5, d_2 = 3.5, \dots, d_{12} = 2.5, d_{13} = 2.5, d_{14} = 3.5, \dots,$$

the constant mobilization cost scenario with  $d_1 = 5, d_2 = 5, d_3 = 5, \dots$

| Component $j$              | 1  | 2  | 3  | 4  | Corresponding month | Monthly maintenance cost |
|----------------------------|----|----|----|----|---------------------|--------------------------|
| Winter start               | 54 | 54 | 54 | 54 | Jun                 | 5.010                    |
| Summer start               | 49 | 49 | 49 | 49 | Jul                 | 4.979                    |
| Constant mobilization cost | 52 | 52 | 52 | 52 | –                   | 5.061                    |

**Table 1.** Summary of the NextPM results for  $\bar{d} = 10$ .

- 10 They suggest (as a consequence of high mobilization costs) to perform PM to all four components at a certain time, irrespective of the scenario. With the summer start setting, the average monthly maintenance cost is somewhat lower. Notice that in all of the seasonal settings, the proposed PM activities are scheduled for summer months (having lower mobilization costs).

Part B. In this section, the mobilization costs are halved to contrast the results of Part A, so that  $\bar{d} = 5$  and  $d_t$  take the following values depending on which month of the year lies behind the time parameter  $t$ :

| Jan | Feb | Mar | Apr | May | Jun | Jul | Aug | Sep | Oct | Nov | Dec |
|-----|-----|-----|-----|-----|-----|-----|-----|-----|-----|-----|-----|
| 7.5 | 6.5 | 5.5 | 4.5 | 3.5 | 2.5 | 2.5 | 3.5 | 4.5 | 5.5 | 6.5 | 7.5 |

The new results presented in Table 2 are drastically different from the results of Part A.

| Component $j$              | 1  | 2  | 3  | 4  | Corresponding month | Monthly maintenance cost |
|----------------------------|----|----|----|----|---------------------|--------------------------|
| Winter start               | x  | x  | 43 | x  | Jul                 | 4.876                    |
| Summer start               | 48 | x  | 48 | x  | Jul                 | 4.863                    |
| Constant mobilization cost | 50 | 50 | 50 | 50 | –                   | 4.964                    |

**Table 2.** Summary of the NextPM results for  $\bar{d} = 5$ .

According to Table 2, in the Winter start setting, the optimal next PM plan suggests a PM activity on month 43 only for the component 3, the gearbox. With the seasonal mobilization cost, the next PM is always planned during the summer since the

20 mobilization cost is low then. Again, the most economic among the three scenarios is to start in the summer time, with the optimal plan being to perform the next PM activity on month 48 by replacing the components 1 and 3.

Part C. A simple wind turbine maintenance strategy is to ignore the PM option and perform a CM activity whenever a turbine component breaks down. This leads to the question: how much can one save by introducing PM planning? The total cost associated with the pure CM strategy is estimated based on the random number of failures over the time interval  $[0, T]$  for all  $n$  components

$$25 \quad F(T) = \sum_{j=1}^n \mathbb{E} \left( \sum_{i=1}^{\infty} 1_{\{V_i^j \leq T\}} (d_{V_i^j} + b_j) \right) = \sum_{j=1}^n \int_0^T (d_u + b_j) dH_j(u), \quad (1)$$

where  $H_j$  are the corresponding renewal functions

$$H_j(t) = \mathbb{E} \left( \sum_{i=1}^{\infty} 1_{\{V_i^j \leq t\}} \right), \quad t > 0, j = 1, \dots, n. \quad (2)$$

According to the standard renewal theory, see for example Grimmett et al. (2020), for the large values of  $T$ ,

$$\frac{F(T)}{T} \approx \sum_{j=1}^n \frac{1}{T\mu_j} \int_0^T (d_u + b_j) du = \sum_{j=1}^n \frac{\bar{d} + b_j}{\mu_j}, \quad (3)$$

30 where  $\bar{d} = \frac{d_1 + \dots + d_T}{T}$ . Applying this approximation to the four-component model of the wind turbine, the monthly maintenance costs for the pure CM strategy are computed to be 7.396 for  $\bar{d} = 5$ , and 7.618 for  $\bar{d} = 10$ . Comparison of the costs produced by the NextPM algorithms in Parts A Table 2 and part B Table 1, shows that implementation of the PM planning results in 35% cost saving.

## References

- 35 Grimmett, G. S. et al.: Probability and random processes, Oxford university press, 2020.
